# Supplementary material
Source: PubMed Central journal article supplement (PMC2804273)
Supplement: jm901059x_si_001.pdf [file jm901059x_si_001.pdf]

## Supporting Information.

### Structure-based Design of Pteridine Reductase Inhibitors Targeting African Sleeping Sickness and the Leishmaniases.

Lindsay B. Tulloch,<sup>1</sup> Viviane P. Martini,<sup>1,2</sup> Jorge Iulek,<sup>1,2</sup> Judith K. Huggan,<sup>3</sup> Jeong Hwan Lee,<sup>3</sup> Colin L. Gibson,<sup>3</sup> Terry K. Smith,<sup>1§</sup> Colin J. Suckling<sup>3</sup> and William N. Hunter<sup>1,\*</sup>

<sup>1</sup>Division of Biological Chemistry and Drug Discovery, College of Life Sciences, University of Dundee, Dundee, DD1 5EH, UK.

<sup>2</sup>Universidade Estadual de Ponta Grossa, Departamento de Química, Av. Carlos Cavalcanti, 4748 Uvaranas, 84030-000, Ponta Grossa, Paraná, Brazil.

<sup>3</sup>WestCHEM, Department of Pure and Applied Chemistry, University of Strathclyde, 295 Cathedral Street, Glasgow, G1 1XL, UK.

<sup>§</sup>Present address: BMS, University of St Andrews, North Haugh, St Andrews, Fife, KY16 9ST, UK.

#### Contents.

Three figures depicting the different scaffold based ligands in a *TbPTR1* active site. Graphs detailing the trypanocidal activity of pyrimethamine or compound **11** in combination with MTX are given together with three tables of crystallographic information.

#### Figure legends.

Figure S1. Scaffold I compounds in the active site of *TbPTR1*. In Figure S1C compound 3 is shown in the MTX-like binding mode.

Figure S2. Scaffold II compounds in the active site of *TbPTR1*.

Figure S3. Scaffold III compounds in the active site of *TbPTR1*.

In all figures, atomic positions are colored N blue, O red, P orange, S yellow, C of PTR1 and NADPH grey, C of ligands pale yellow. An exception is made for the side chain of Phe97, which, for the purpose of clarity since it is directly over the ligand binding position, is shown in thin dark grey lines. In several of the structures Cys168 is oxidized to sulfenic acid, in a number of others it is modified by dithiothreitol (DTT). Hydrogen bonds are depicted as dashed lines, water molecules are shown as red spheres. Compounds are labeled according to the assignment in Tables 1, 2 and 3.

Figure S4. Trypanocidal activity of PTR1 and DHFR inhibitors. (A) Changes in pyrimethamine ED<sub>50</sub> values in combination with varying concentrations (0, 0.5, 1.0, 1.5, 2.0, 2.5 μM) of MTX. (B) Changes in **11** ED<sub>50</sub> values in combination with varying concentrations (0, 0.5, 1.0, 1.5, 2.0, 2.5 μM) of MTX. Values are means ± std. dev. (n = 4).

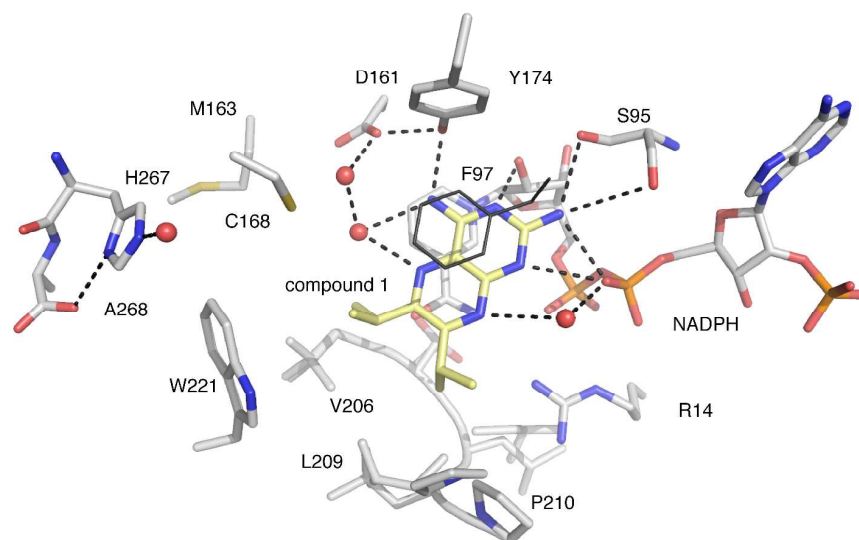

Figure S1A

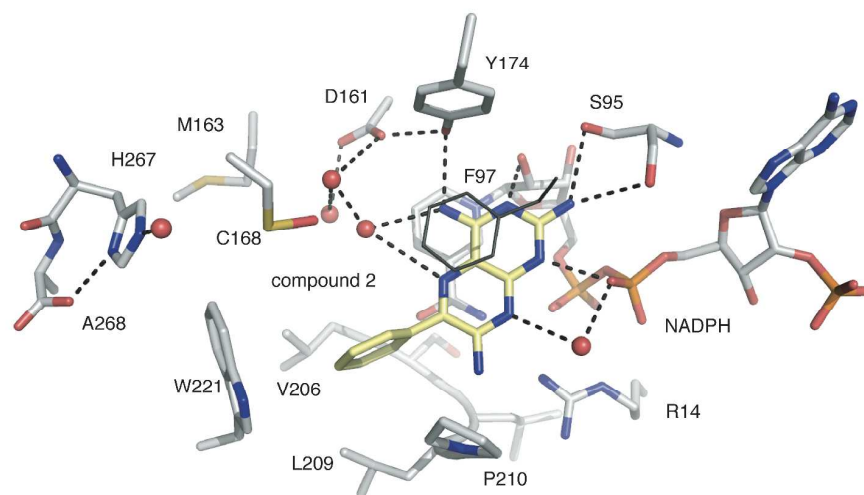

Figure S1B

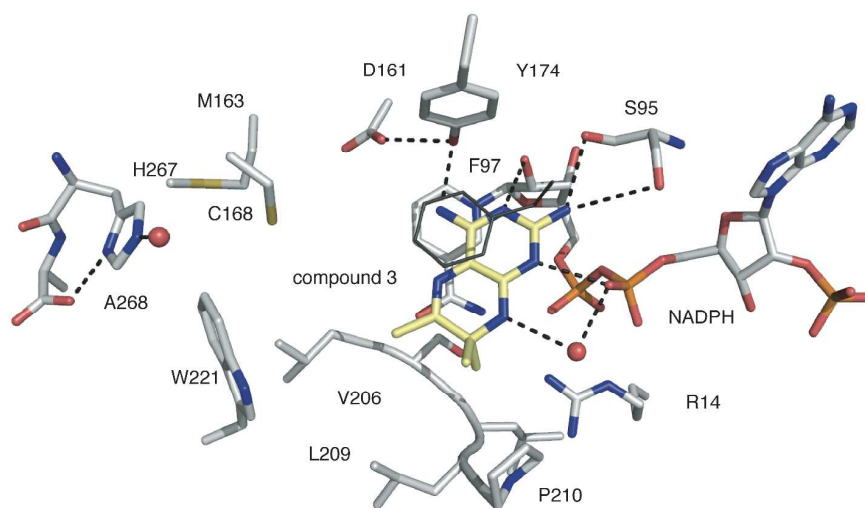

Figure S1C

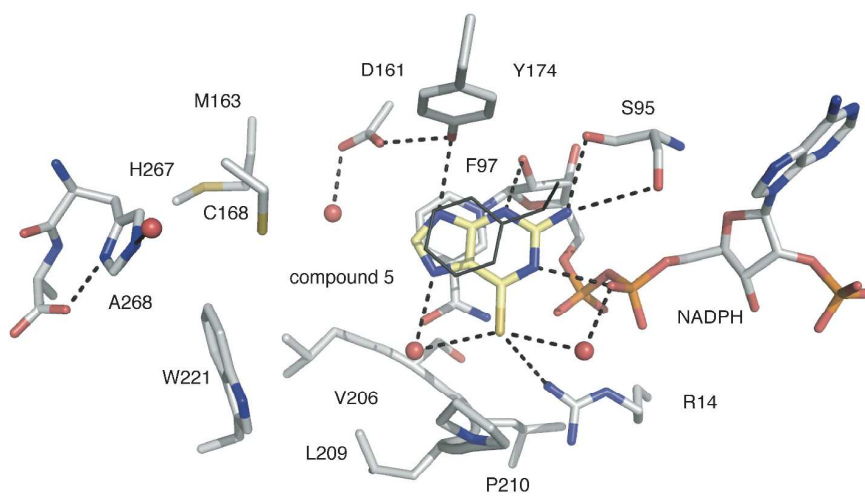

Figure S2A

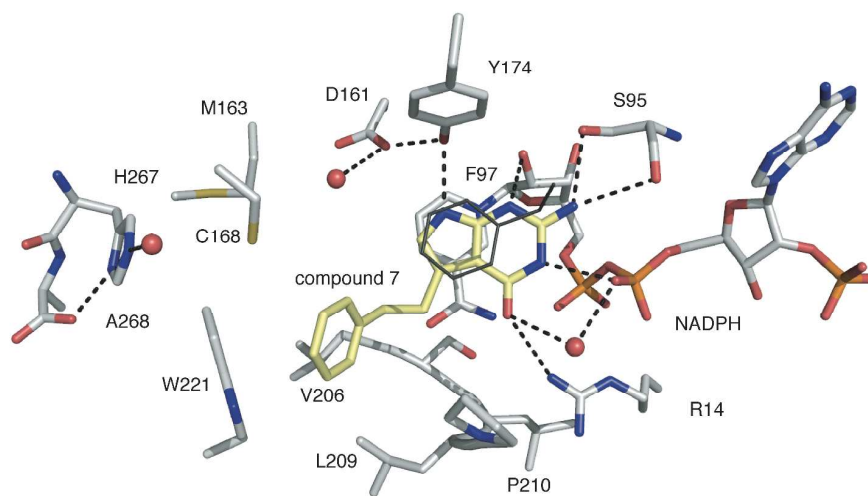

Figure S2B

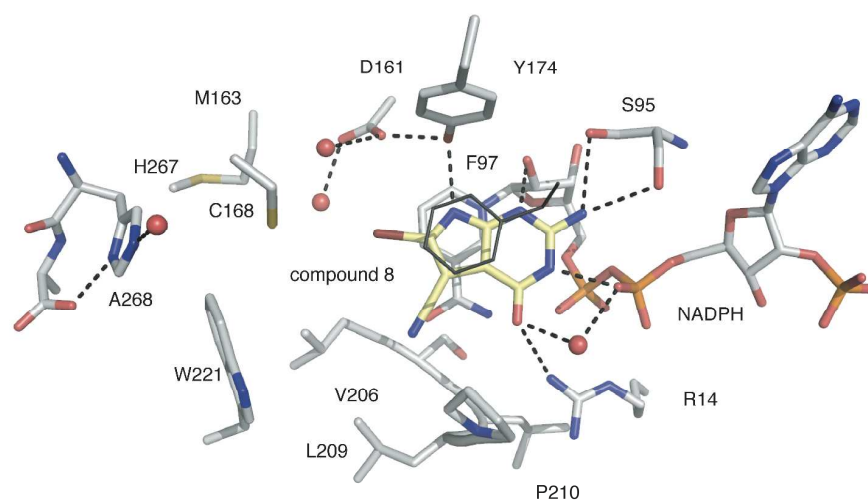

Figure S2C

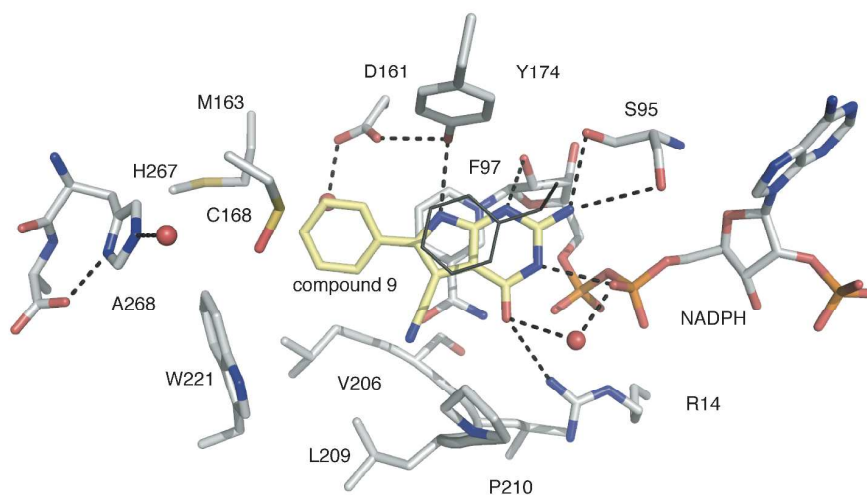

Figure S2D

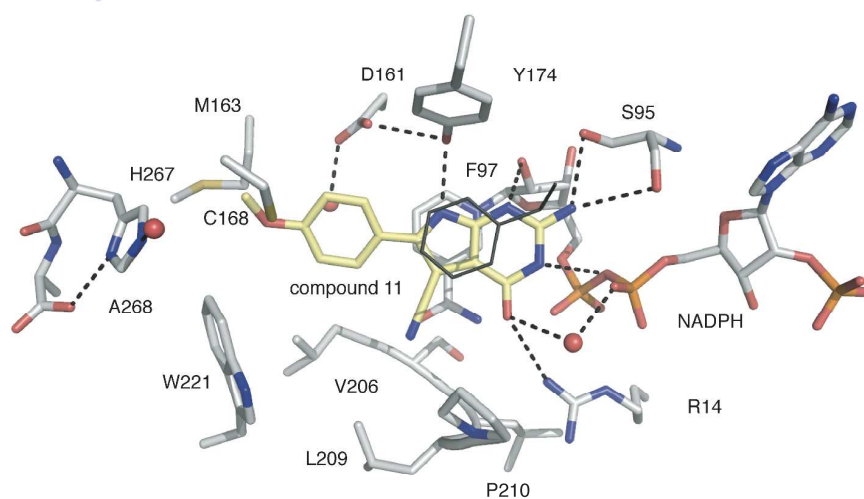

Figure S2E

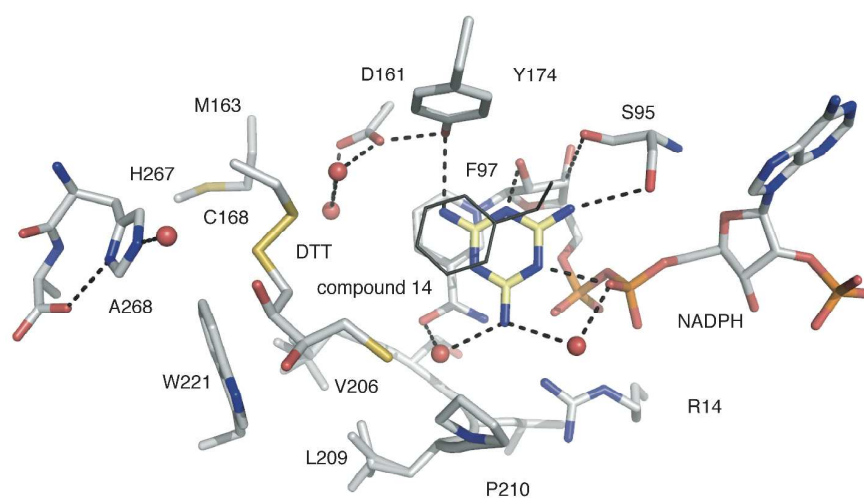

Figure S3A

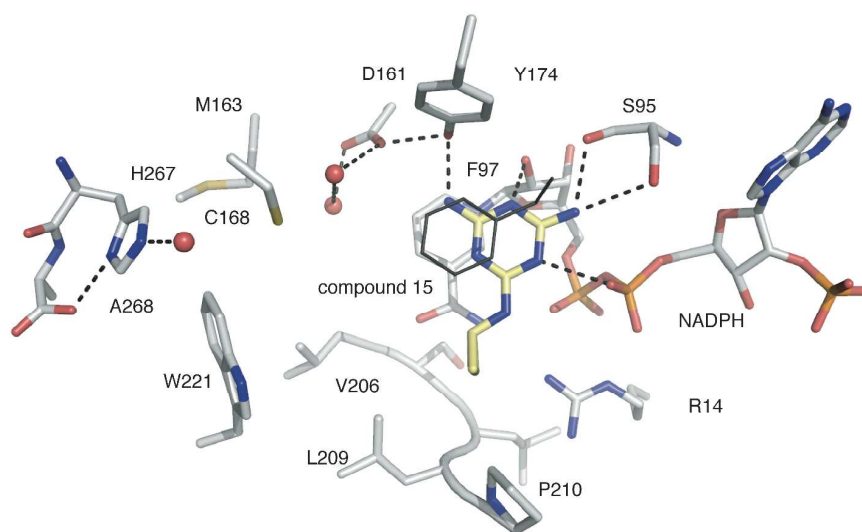

Figure S3B

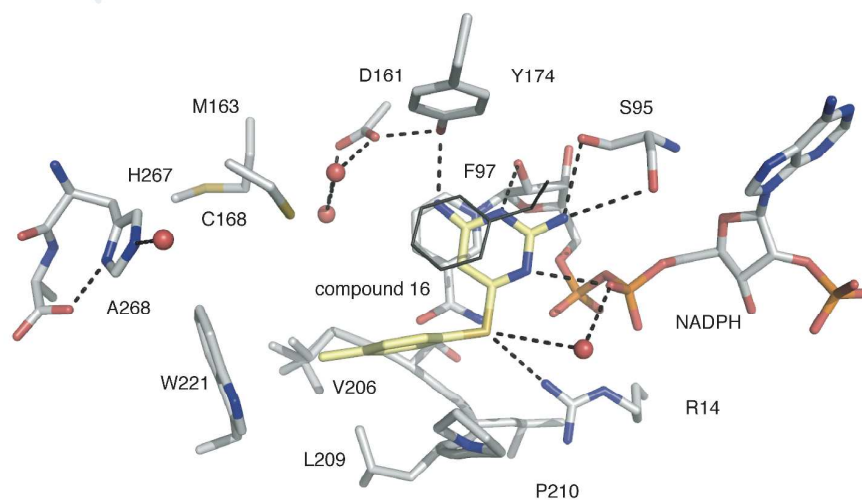

Figure S3C

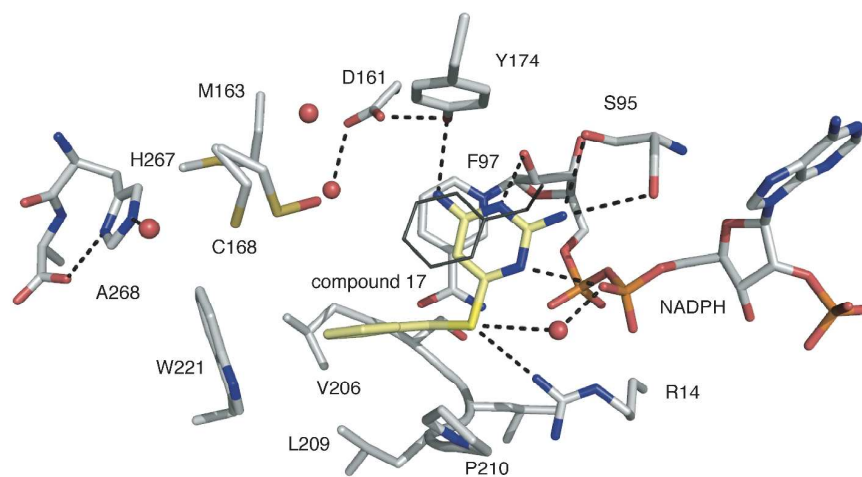

Figure S3D

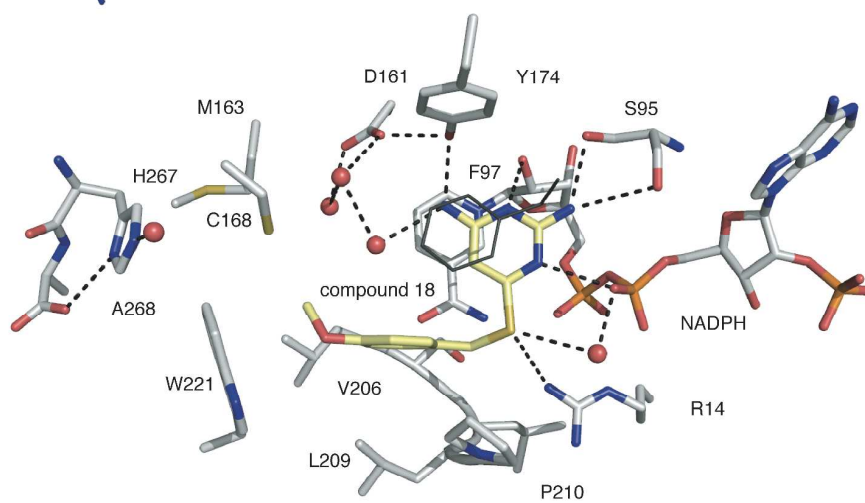

Figure S3E

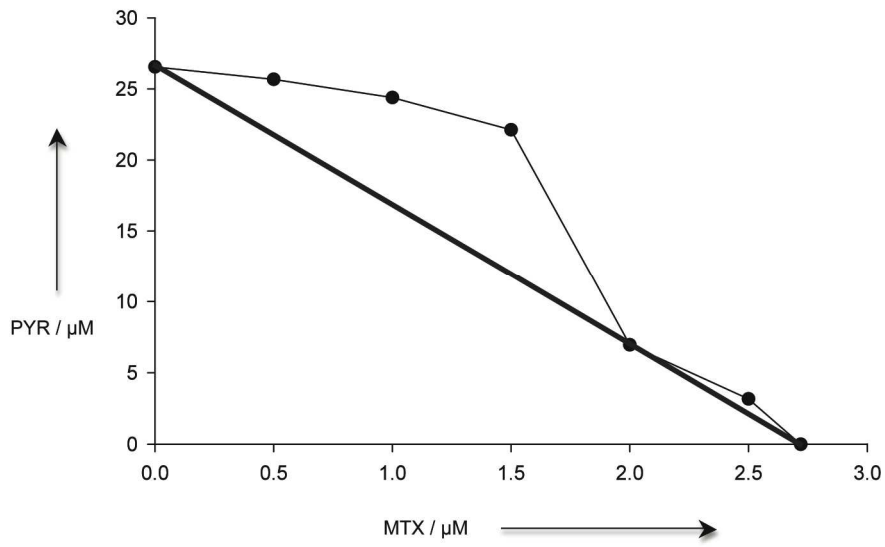

Figure S4A

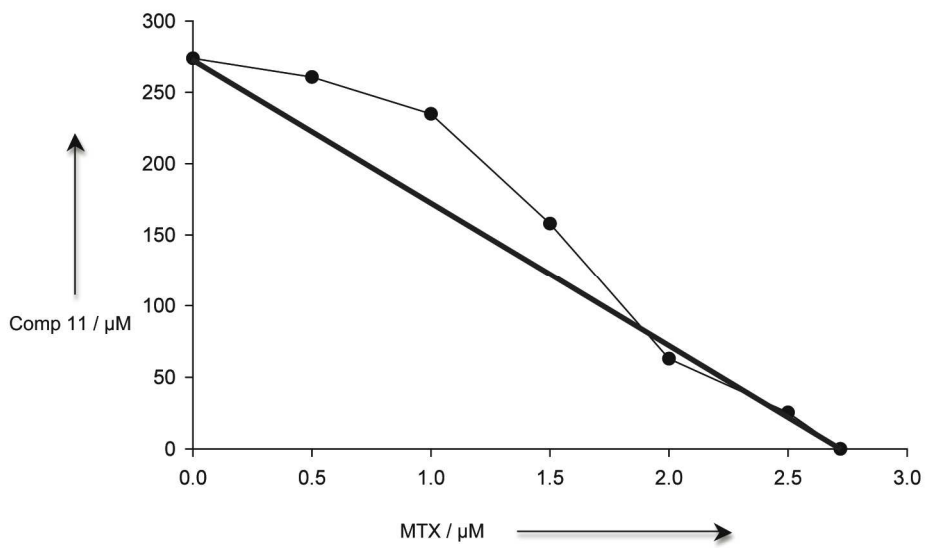

Figure S4B



**Supplemental Table S1 – *Tb*PTR1-Folate and *Tb*PTR1-Scaffold I inhibitors**

| <b>Ligand</b>                                   | <b>Folate</b>                      |            |       |      | <b>Compound 1</b>                  |             |       |      | <b>Compound 2</b>                  |            |       |      | <b>Compound 3</b>                  |            |       |      |      |   |
|-------------------------------------------------|------------------------------------|------------|-------|------|------------------------------------|-------------|-------|------|------------------------------------|------------|-------|------|------------------------------------|------------|-------|------|------|---|
| PDB Code                                        | 3BMC                               |            |       |      | 3JQ6                               |             |       |      | 3JQ7                               |            |       |      | 3JQ8                               |            |       |      |      |   |
| <b>Crystal Statistics</b>                       |                                    |            |       |      |                                    |             |       |      |                                    |            |       |      |                                    |            |       |      |      |   |
| <b>Resolution range</b> (Å)                     | 2.60 – 37.70                       |            |       |      | 1.80 – 30.70                       |             |       |      | 1.90 – 74.30                       |            |       |      | 1.95 – 67.40                       |            |       |      |      |   |
| <b>Space Group</b>                              | <i>P</i> <sub>2</sub> <sub>1</sub> |            |       |      | <i>P</i> <sub>2</sub> <sub>1</sub> |             |       |      | <i>P</i> <sub>2</sub> <sub>1</sub> |            |       |      | <i>P</i> <sub>2</sub> <sub>1</sub> |            |       |      |      |   |
| <b>Unit cell dimensions:</b>                    |                                    |            |       |      |                                    |             |       |      |                                    |            |       |      |                                    |            |       |      |      |   |
| <i>a</i> , <i>b</i> , <i>c</i> (Å)              | 74.44                              | 86.60      | 81.59 |      | 74.14                              | 89.47       | 84.34 |      | 74.54                              | 90.03      | 82.36 |      | 74.10                              | 89.15      | 84.19 |      |      |   |
| <i>β</i> (°)                                    | 115.3                              |            |       |      | 115.5                              |             |       |      | 115.5                              |            |       |      | 115.5                              |            |       |      |      |   |
| <b>Scaling Statistics</b>                       |                                    |            |       |      |                                    |             |       |      |                                    |            |       |      |                                    |            |       |      |      |   |
| <b>Data collection location</b>                 | In-House                           |            |       |      | ESRF ID29                          |             |       |      | ESRF ID23-1                        |            |       |      | ESRF ID29                          |            |       |      |      |   |
| <b>No. Measurements</b>                         | 51,646                             |            |       |      | 396,003                            |             |       |      | 256,628                            |            |       |      | 303,151                            |            |       |      |      |   |
| <b>Unique reflections</b>                       | 23,556                             |            |       |      | 92,014                             |             |       |      | 90,613                             |            |       |      | 70,867                             |            |       |      |      |   |
| <b>Redundancy</b>                               | 2.2 ( 2.3) <sup>a, b</sup>         |            |       |      | 4.3 ( 4.3) <sup>a</sup>            |             |       |      | 2.8 ( 2.9) <sup>a</sup>            |            |       |      | 4.3 ( 4.8) <sup>a</sup>            |            |       |      |      |   |
| <b>Completeness</b> (%)                         | 81.1 (74.0) <sup>a</sup>           |            |       |      | 99.9 (100.0) <sup>a</sup>          |             |       |      | 99.7 (100.0) <sup>a</sup>          |            |       |      | 98.5 (97.6) <sup>a</sup>           |            |       |      |      |   |
| <b>&lt; I / σ(I) &gt;</b>                       | 13.7 ( 3.0) <sup>a</sup>           |            |       |      | 13.5 ( 3.5) <sup>a</sup>           |             |       |      | 11.6 ( 2.6) <sup>a</sup>           |            |       |      | 10.4 ( 4.0) <sup>a</sup>           |            |       |      |      |   |
| <b>R<sub>merge</sub></b> (%)                    | 6.8 (37.7) <sup>a</sup>            |            |       |      | 8.0 ( 36.4) <sup>a</sup>           |             |       |      | 3.6 ( 25.0) <sup>a</sup>           |            |       |      | 6.6 (22.0) <sup>a</sup>            |            |       |      |      |   |
| <b>Refinement Statistics</b>                    |                                    |            |       |      |                                    |             |       |      |                                    |            |       |      |                                    |            |       |      |      |   |
| <b>R<sub>work</sub> (%) / No of reflections</b> | 18.9 / 22,315                      |            |       |      | 15.0 / 87,338                      |             |       |      | 15.2 / 86,018                      |            |       |      | 24.0 / 66,848                      |            |       |      |      |   |
| <b>R<sub>free</sub> (%) / No of reflections</b> | 22.4 / 1,241                       |            |       |      | 19.0 / 4,676                       |             |       |      | 19.1 / 4,595                       |            |       |      | 28.7 / 4,019                       |            |       |      |      |   |
| <b>R.M.S.D bond lengths</b> (Å)                 | 0.009                              |            |       |      | 0.011                              |             |       |      | 0.014                              |            |       |      | 0.007                              |            |       |      |      |   |
| <b>R.M.S.D bond angles</b> (°)                  | 1.460                              |            |       |      | 1.305                              |             |       |      | 1.501                              |            |       |      | 1.101                              |            |       |      |      |   |
| <b>DPI<sup>c</sup></b>                          | 0.42                               |            |       |      | 0.12                               |             |       |      | 0.11                               |            |       |      | 0.24                               |            |       |      |      |   |
| <b>Ramachandran:</b>                            |                                    |            |       |      |                                    |             |       |      |                                    |            |       |      |                                    |            |       |      |      |   |
| Core region (%)                                 | 88.7                               |            |       |      | 88.7                               |             |       |      | 88.6                               |            |       |      | 88.8                               |            |       |      |      |   |
| Allowed region (%)                              | 10.9                               |            |       |      | 10.9                               |             |       |      | 10.9                               |            |       |      | 10.8                               |            |       |      |      |   |
| Generous region (%)                             | 0.5                                |            |       |      | 0.5                                |             |       |      | 0.6                                |            |       |      | 0.3                                |            |       |      |      |   |
| <b>Model Statistics</b>                         |                                    |            |       |      |                                    |             |       |      |                                    |            |       |      |                                    |            |       |      |      |   |
| <b>Protein residues:</b>                        |                                    |            |       |      |                                    |             |       |      |                                    |            |       |      |                                    |            |       |      |      |   |
| Total                                           | 990                                |            |       |      | 981                                |             |       |      | 975                                |            |       |      | 979                                |            |       |      |      |   |
| Overall <i>B</i> -factor                        | 30.7                               |            |       |      | 16.0                               |             |       |      | 27.6                               |            |       |      | 14.6                               |            |       |      |      |   |
| No. in subunits                                 | A-D                                | 248        | 247   | 247  | 248                                | 246         | 244   | 245  | 246                                | 247        | 244   | 237  | 247                                | 246        | 246   | 240  | 247  |   |
| <i>B</i> -factor                                | A-D                                | 30.8       | 30.7  | 30.7 | 30.8                               | 15.9        | 16.3  | 15.6 | 16.3                               | 27.0       | 26.1  | 27.9 | 27.9                               | 15.1       | 15.6  | 16.3 | 14.8 |   |
| <b>Additional groups:</b>                       |                                    |            |       |      |                                    |             |       |      |                                    |            |       |      |                                    |            |       |      |      |   |
| Solvent                                         | No/Av. <i>B</i> -factor            | 255 / 29.2 |       |      |                                    | 1023 / 29.5 |       |      |                                    | 611 / 39.8 |       |      |                                    | 976 / 22.4 |       |      |      |   |
| NADP <sup>+</sup>                               | <i>B</i> -factor A-D               | 30.9       | 30.9  | 30.9 | 30.9                               | 12.4        | 14.5  | 13.7 | 14.0                               | 23.1       | 21.2  | 33.2 | 25.9                               | 12.6       | 12.3  | 13.5 | 11.9 |   |
| Ligand, conf. a                                 | <i>B</i> -factor A-D               | 31.1       | 31.1  | 31.1 | 31.2                               | 25.7        | 29.5  | 22.1 | 25.2                               | 32.1       | 28.6  | 81.0 | 36.2                               | 18.6       | 18.6  | 18.6 | 18.6 |   |
| Ligand, conf. b                                 | <i>B</i> -factor A-D               | -          |       |      |                                    | -           |       |      |                                    | -          |       |      |                                    | 18.6       |       |      |      |   |
| DTT <sup>d</sup>                                | <i>B</i> -factor A-D               | -          |       |      |                                    | 47.4        | 47.9  | 55.9 | 59.2                               | -          | 49.9  | -    | -                                  | -          | -     | -    | 18.6 | - |
| Acetate                                         | <i>B</i> -factor E                 | -          |       |      |                                    | -           |       |      |                                    | 29.5       |       |      |                                    | -          |       |      |      |   |
| <b>Cys168 modification<sup>e</sup></b>          | A-D                                | CSX        | -     | -    | -                                  | DTT         | DTT   | DTT  | DTT                                | CSX        | DTT   | CSX  | CSX                                | -          | CSX   | DTT  | -    |   |

<sup>a</sup> Values in parentheses refer to those of the highest resolution shell.

<sup>b</sup> Incomplete data collection due to hardware problem.

<sup>c</sup> DPI – Diffraction-component Precision Index.

<sup>d</sup> DTT – linear DTT.

<sup>e</sup> Cys168 oxidized to sulfenic acid (CSX), covalently bound to DTT (DTT), or unmodified (-)

**Supplemental Table S2 – *Tb*PTR1-Scaffold II inhibitors**

| Ligand                                  | Compound 5               |            |       |      | Compound 7               |            |       |      | Compound 8               |            |       |      | Compound 9               |             |       |      | Compound 11              |            |       |      | Compound 13              |            |       |      |      |  |
|-----------------------------------------|--------------------------|------------|-------|------|--------------------------|------------|-------|------|--------------------------|------------|-------|------|--------------------------|-------------|-------|------|--------------------------|------------|-------|------|--------------------------|------------|-------|------|------|--|
| PDB Code                                | 3JQA                     |            |       |      | 3JQB                     |            |       |      | 3JQC                     |            |       |      | 3JQD                     |             |       |      | 3JQE                     |            |       |      | 3JQ9                     |            |       |      |      |  |
| <b>Crystal Statistics</b>               |                          |            |       |      |                          |            |       |      |                          |            |       |      |                          |             |       |      |                          |            |       |      |                          |            |       |      |      |  |
| Resolution range (Å)                    | 1.90 – 74.50             |            |       |      | 2.40 – 45.20             |            |       |      | 1.80 – 75.60             |            |       |      | 1.60 – 39.00             |             |       |      | 2.00 – 34.30             |            |       |      | 2.30 – 89.10             |            |       |      |      |  |
| Space Group                             | $P2_1$                   |            |       |      | $P2_1$                   |            |       |      | $P2_1$                   |            |       |      | $P2_1$                   |             |       |      | $P2_1$                   |            |       |      | $P2_1$                   |            |       |      |      |  |
| Unit cell dimensions:                   |                          |            |       |      |                          |            |       |      |                          |            |       |      |                          |             |       |      |                          |            |       |      |                          |            |       |      |      |  |
| $a, b, c$ (Å)                           | 75.00                    | 90.83      | 82.64 |      | 74.67                    | 90.43      | 82.56 |      | 73.86                    | 89.11      | 84.25 |      | 74.64                    | 90.73       | 84.64 |      | 74.58                    | 89.42      | 82.37 |      | 74.25                    | 89.20      | 84.57 |      |      |  |
| $\beta$ (°)                             |                          | 115.5      |       |      |                          | 115.5      |       |      |                          | 116.1      |       |      |                          | 115.3       |       |      |                          | 115.6      |       |      |                          | 115.7      |       |      |      |  |
| <b>Scaling Statistics</b>               |                          |            |       |      |                          |            |       |      |                          |            |       |      |                          |             |       |      |                          |            |       |      |                          |            |       |      |      |  |
| Data collection location                | ESRF ID23-2              |            |       |      | ESRF ID23-2              |            |       |      | ESRF BM14                |            |       |      | ESRF ID23-2              |             |       |      | In-House                 |            |       |      | ESRF ID23-1              |            |       |      |      |  |
| No. Measurements                        | 233,755                  |            |       |      | 97,866                   |            |       |      | 254,618                  |            |       |      | 330,090                  |             |       |      | 311,305                  |            |       |      | 114,819                  |            |       |      |      |  |
| Unique reflections                      | 78,741                   |            |       |      | 38,283                   |            |       |      | 84,262                   |            |       |      | 108,123                  |             |       |      | 62,121                   |            |       |      | 40,166                   |            |       |      |      |  |
| Redundancy                              | 3.0 ( 3.3) <sup>a</sup>  |            |       |      | 2.6 ( 2.6) <sup>a</sup>  |            |       |      | 3.0 ( 2.7) <sup>a</sup>  |            |       |      | 3.1 ( 2.9) <sup>a</sup>  |             |       |      | 5.0 ( 4.9) <sup>a</sup>  |            |       |      | 2.9 ( 3.0) <sup>a</sup>  |            |       |      |      |  |
| Completeness (%)                        | 99.9 (99.9) <sup>a</sup> |            |       |      | 98.7 (99.2) <sup>a</sup> |            |       |      | 92.9 (65.2) <sup>a</sup> |            |       |      | 81.7 (84.9) <sup>a</sup> |             |       |      | 94.4 (88.1) <sup>a</sup> |            |       |      | 90.9 (64.3) <sup>a</sup> |            |       |      |      |  |
| $\langle I / \langle I \rangle \rangle$ | 9.9 ( 3.1) <sup>a</sup>  |            |       |      | 9.4 ( 6.6) <sup>a</sup>  |            |       |      | 11.9 ( 1.8) <sup>a</sup> |            |       |      | 10.2 ( 3.0) <sup>a</sup> |             |       |      | 24.4 ( 9.1) <sup>a</sup> |            |       |      | 8.0 ( 2.2) <sup>a</sup>  |            |       |      |      |  |
| R <sub>merge</sub> (%)                  | 5.7 (32.0) <sup>a</sup>  |            |       |      | 11.0 (12.9) <sup>a</sup> |            |       |      | 4.7 (37.7) <sup>a</sup>  |            |       |      | 8.9 (33.2) <sup>a</sup>  |             |       |      | 8.2 (22.1) <sup>a</sup>  |            |       |      | 7.3 (36.1) <sup>a</sup>  |            |       |      |      |  |
| <b>Refinement Stats</b>                 |                          |            |       |      |                          |            |       |      |                          |            |       |      |                          |             |       |      |                          |            |       |      |                          |            |       |      |      |  |
| R <sub>work</sub> (%) / No. reflect.    | 14.7 / 74,742            |            |       |      | 19.2 / 36,312            |            |       |      | 16.8 / 79,975            |            |       |      | 17.9 / 102,629           |             |       |      | 15.2 / 58,920            |            |       |      | 23.1 / 38,112            |            |       |      |      |  |
| R <sub>free</sub> (%) / No. reflect.    | 18.9 / 3,999             |            |       |      | 25.2 / 1,971             |            |       |      | 20.4 / 4,287             |            |       |      | 21.6 / 5,494             |             |       |      | 21.3 / 3,201             |            |       |      | 28.6 / 2,054             |            |       |      |      |  |
| R.M.S.D bond leng. (Å)                  | 0.013                    |            |       |      | 0.007                    |            |       |      | 0.008                    |            |       |      | 0.007                    |             |       |      | 0.012                    |            |       |      | 0.006                    |            |       |      |      |  |
| R.M.S.D bond ang. (°)                   | 1.342                    |            |       |      | 1.004                    |            |       |      | 1.424                    |            |       |      | 1.154                    |             |       |      | 1.431                    |            |       |      | 1.115                    |            |       |      |      |  |
| DPI <sup>c</sup>                        | 0.12                     |            |       |      | 0.66                     |            |       |      | 0.14                     |            |       |      | 0.12                     |             |       |      | 0.19                     |            |       |      | 0.64                     |            |       |      |      |  |
| <b>Ramachandran:</b>                    |                          |            |       |      |                          |            |       |      |                          |            |       |      |                          |             |       |      |                          |            |       |      |                          |            |       |      |      |  |
| Core region (%)                         | 88.8                     |            |       |      | 89.3                     |            |       |      | 89.0                     |            |       |      | 88.9                     |             |       |      | 89.2                     |            |       |      | 88.7                     |            |       |      |      |  |
| Allowed region (%)                      | 10.7                     |            |       |      | 10.3                     |            |       |      | 10.5                     |            |       |      | 10.4                     |             |       |      | 10.3                     |            |       |      | 10.4                     |            |       |      |      |  |
| Generous region (%)                     | 0.5                      |            |       |      | 0.5                      |            |       |      | 0.6                      |            |       |      | 0.7                      |             |       |      | 0.6                      |            |       |      | 0.6                      |            |       |      |      |  |
| <b>Model Statistics</b>                 |                          |            |       |      |                          |            |       |      |                          |            |       |      |                          |             |       |      |                          |            |       |      |                          |            |       |      |      |  |
| <b>Protein residues:</b>                |                          |            |       |      |                          |            |       |      |                          |            |       |      |                          |             |       |      |                          |            |       |      |                          |            |       |      |      |  |
| Total                                   | 987                      |            |       |      | 986                      |            |       |      | 990                      |            |       |      | 985                      |             |       |      | 987                      |            |       |      | 987                      |            |       |      |      |  |
| Overall $B$ -factor                     | 23.3                     |            |       |      | 6.1                      |            |       |      | 17.2                     |            |       |      | 13.7                     |             |       |      | 15.6                     |            |       |      | 41.4                     |            |       |      |      |  |
| No. in subunits                         | A-D                      | 247        | 246   | 247  | 247                      | 247        | 246   | 246  | 247                      | 247        | 248   | 248  | 247                      | 247         | 246   | 246  | 246                      | 247        | 246   | 247  | 247                      | 247        | 246   | 247  |      |  |
| $B$ -factor                             | A-D                      | 22.9       | 22.7  | 23.0 | 22.8                     | 7.6        | 6.8   | 8.1  | 7.9                      | 17.2       | 17.6  | 17.6 | 17.3                     | 14.5        | 13.9  | 14.0 | 14.3                     | 15.7       | 15.6  | 15.9 | 15.8                     | 41.2       | 41.3  | 42.0 | 41.7 |  |
| <b>Additional groups:</b>               |                          |            |       |      |                          |            |       |      |                          |            |       |      |                          |             |       |      |                          |            |       |      |                          |            |       |      |      |  |
| Solvent                                 | No./Av. $B$ -factor      | 638 / 35.3 |       |      |                          | 358 / 11.6 |       |      |                          | 731 / 27.9 |       |      |                          | 1197 / 28.3 |       |      |                          | 824 / 21.3 |       |      |                          | 214 / 32.1 |       |      |      |  |
| NADP <sup>+</sup>                       | $B$ -factor A-D          | 21.9       | 20.1  | 26.2 | 22.1                     | 3.6        | 3.5   | 13.8 | 5.2                      | 15.5       | 15.3  | 15.6 | 15.7                     | 13.8        | 12.0  | 12.3 | 12.9                     | 15.4       | 15.3  | 15.7 | 15.3                     | 34.3       | 32.2  | 36.5 | 35.4 |  |
| Ligand                                  | $B$ -factor A-D          | 21.8       | 21.3  | 34.4 | 27.2                     | 28.8       | 30.4  | 44.5 | -                        | 16.6       | 16.8  | 16.5 | 19.8                     | 23.5        | 25.6  | 25.6 | 27.7                     | 28.4       | 27.5  | 31.7 | 30.1                     | 45.5       | 39.6  | 30.8 | 48.7 |  |
| DTT <sup>d</sup>                        | $B$ -factor A-D          | -          |       |      |                          | -          |       |      |                          | 65.9       | -     |      |                          |             | -     |      |                          |            | -     |      |                          |            | -     |      |      |  |
| Cys168 mod. <sup>e</sup>                | A-D                      | -          | CSX   | -    | CSX                      | CSX        | CSX   | CSX  | DTT                      | -          |       |      |                          | -           | CSX   | CSX  | CSX                      | -          |       |      |                          | -          | -     | CSX  | CSX  |  |

<sup>a</sup> Values in parentheses refer to those of the highest resolution shell.  
<sup>b</sup> Incomplete data collection due to radiation damage.  
<sup>c</sup> DPI – Diffraction-component Precision Index.  
<sup>d</sup> DTT – linear DTT.  
<sup>e</sup> Cys168 oxidized to sulfenic acid (CSX), covalently bound to DTT (DTT), or unmodified (-)

Supplemental Table S3 – 7bPTR1-Scaffold III inhibitors

| Ligand                                  | Compound 14              |             |       |      | Compound 15              |            |       |      | Compound 16              |             |       |      | Compound 17              |             |       |      | Compound 18              |            |       |      |      |      |
|-----------------------------------------|--------------------------|-------------|-------|------|--------------------------|------------|-------|------|--------------------------|-------------|-------|------|--------------------------|-------------|-------|------|--------------------------|------------|-------|------|------|------|
| PDB Code                                | 3JQF                     |             |       |      | 3BMN                     |            |       |      | 3BMO                     |             |       |      | 3BMQ                     |             |       |      | 3JQG                     |            |       |      |      |      |
| <b>Crystal Statistics</b>               |                          |             |       |      |                          |            |       |      |                          |             |       |      |                          |             |       |      |                          |            |       |      |      |      |
| Resolution range (Å)                    | 1.60 – 23.40             |             |       |      | 2.00 – 75.60             |            |       |      | 1.60 – 74.50             |             |       |      | 1.70 – 74.50             |             |       |      | 1.90 – 53.80             |            |       |      |      |      |
| Space Group                             | $P2_1$                   |             |       |      | $P2_1$                   |            |       |      | $P2_1$                   |             |       |      | $P2_1$                   |             |       |      | $P2_1$                   |            |       |      |      |      |
| Unit cell dimensions:                   |                          |             |       |      |                          |            |       |      |                          |             |       |      |                          |             |       |      |                          |            |       |      |      |      |
| $a, b, c$ (Å)                           | 74.55                    | 90.24       | 82.41 |      | 73.84                    | 87.50      | 84.23 |      | 74.73                    | 90.99       | 82.82 |      | 74.72                    | 91.16       | 82.83 |      | 74.53                    | 89.85      | 82.44 |      |      |      |
| $\alpha$ (°)                            |                          | 115.6       |       |      |                          | 116.1      |       |      |                          | 115.8       |       |      |                          | 115.7       |       |      |                          | 115.5      |       |      |      |      |
| <b>Scaling Statistics</b>               |                          |             |       |      |                          |            |       |      |                          |             |       |      |                          |             |       |      |                          |            |       |      |      |      |
| Data collection location                | SRS 14.1                 |             |       |      | ESRF BM14                |            |       |      | SRS 14.1                 |             |       |      | SRS 14.1                 |             |       |      | ESRF ID23-2              |            |       |      |      |      |
| No. Measurements                        | 358,472                  |             |       |      | 244,417                  |            |       |      | 437,070                  |             |       |      | 522,876                  |             |       |      | 180,679                  |            |       |      |      |      |
| Unique reflections                      | 119,467                  |             |       |      | 63,759                   |            |       |      | 125,691                  |             |       |      | 94,013                   |             |       |      | 74,417                   |            |       |      |      |      |
| Redundancy                              | 3.0 ( 3.2) <sup>a</sup>  |             |       |      | 3.8 ( 3.6) <sup>a</sup>  |            |       |      | 3.5 ( 3.3) <sup>a</sup>  |             |       |      | 5.6 ( 5.5) <sup>a</sup>  |             |       |      | 2.4 ( 2.7) <sup>a</sup>  |            |       |      |      |      |
| Completeness (%)                        | 92.5 (88.0) <sup>a</sup> |             |       |      | 94.9 (88.1) <sup>a</sup> |            |       |      | 96.0 (99.4) <sup>a</sup> |             |       |      | 85.8 (90.6) <sup>a</sup> |             |       |      | 96.5 (96.6) <sup>a</sup> |            |       |      |      |      |
| $\langle I / \langle I \rangle \rangle$ | 12.4 ( 2.4) <sup>a</sup> |             |       |      | 14.3 ( 4.3) <sup>a</sup> |            |       |      | 16.9 ( 3.8) <sup>a</sup> |             |       |      | 21.3 ( 9.5) <sup>a</sup> |             |       |      | 5.9 ( 1.9) <sup>a</sup>  |            |       |      |      |      |
| R <sub>merge</sub> (%)                  | 3.4 (34.7) <sup>a</sup>  |             |       |      | 10.3 (36.7) <sup>a</sup> |            |       |      | 4.7 (39.3) <sup>a</sup>  |             |       |      | 5.5 (14.7) <sup>a</sup>  |             |       |      | 9.2 (29.0) <sup>a</sup>  |            |       |      |      |      |
| <b>Refinement Stats</b>                 |                          |             |       |      |                          |            |       |      |                          |             |       |      |                          |             |       |      |                          |            |       |      |      |      |
| R <sub>work</sub> (%) / No. reflect.    | 14.5 / 113,438           |             |       |      | 20.6 / 61,175            |            |       |      | 11.8 / 119,087           |             |       |      | 13.1 / 88,770            |             |       |      | 21.1 / 70,662            |            |       |      |      |      |
| R <sub>free</sub> (%) / No. reflect.    | 18.6 / 6,029             |             |       |      | 26.7 / 2,584             |            |       |      | 15.0 / 6,604             |             |       |      | 17.8 / 5,243             |             |       |      | 26.7 / 3,755             |            |       |      |      |      |
| R.M.S.D bond leng. (Å)                  | 0.017                    |             |       |      | 0.006                    |            |       |      | 0.016                    |             |       |      | 0.019                    |             |       |      | 0.014                    |            |       |      |      |      |
| R.M.S.D bond ang. (°)                   | 1.601                    |             |       |      | 2.028                    |            |       |      | 1.644                    |             |       |      | 1.731                    |             |       |      | 1.531                    |            |       |      |      |      |
| DPI <sup>b</sup>                        | 0.08                     |             |       |      | 0.23                     |            |       |      | 0.07                     |             |       |      | 0.10                     |             |       |      | 0.20                     |            |       |      |      |      |
| <b>Ramachandran:</b>                    |                          |             |       |      |                          |            |       |      |                          |             |       |      |                          |             |       |      |                          |            |       |      |      |      |
| Core region (%)                         | 89.0                     |             |       |      | 86.9                     |            |       |      | 89.8                     |             |       |      | 88.5                     |             |       |      | 88.7                     |            |       |      |      |      |
| Allowed region (%)                      | 10.5                     |             |       |      | 12.6                     |            |       |      | 9.9                      |             |       |      | 11.0                     |             |       |      | 10.9                     |            |       |      |      |      |
| Generous region (%)                     | 0.5                      |             |       |      | 0.6                      |            |       |      | 0.3                      |             |       |      | 0.5                      |             |       |      | 0.5                      |            |       |      |      |      |
| <b>Model Statistics</b>                 |                          |             |       |      |                          |            |       |      |                          |             |       |      |                          |             |       |      |                          |            |       |      |      |      |
| <b>Protein residues:</b>                |                          |             |       |      |                          |            |       |      |                          |             |       |      |                          |             |       |      |                          |            |       |      |      |      |
| Total (number)                          | 978                      |             |       |      | 999                      |            |       |      | 992                      |             |       |      | 999                      |             |       |      | 986                      |            |       |      |      |      |
| Overall ( $\beta$ -factor)              | 19.9                     |             |       |      | 26.4                     |            |       |      | 12.9                     |             |       |      | 10.9                     |             |       |      | 15.7                     |            |       |      |      |      |
| No. in subunits                         | A-D                      | 245         | 244   | 244  | 245                      | 249        | 250   | 249  | 251                      | 251         | 245   | 248  | 248                      | 250         | 250   | 249  | 250                      | 247        | 246   | 246  | 247  |      |
| $\beta$ -factor                         | A-D                      | 18.9        | 19.0  | 20.5 | 20.4                     | 26.2       | 26.9  | 26.2 | 26.1                     | 12.7        | 11.4  | 13.8 | 13.8                     | 10.7        | 10.3  | 11.1 | 11.6                     | 16.5       | 16.8  | 17.6 | 17.5 |      |
| <b>Additional groups:</b>               |                          |             |       |      |                          |            |       |      |                          |             |       |      |                          |             |       |      |                          |            |       |      |      |      |
| Solvent                                 | No/Av.                   | 1080 / 38.5 |       |      |                          | 540 / 31.3 |       |      |                          | 1251 / 33.1 |       |      |                          | 1316 / 27.6 |       |      |                          | 612 / 24.5 |       |      |      |      |
| NADP <sup>+</sup>                       | $\beta$ -factor          | A-D         | 16.1  | 15.2 | 17.0                     | 17.3       | 21.2  | 20.9 | 20.7                     | 20.4        | 9.5   | 8.7  | 10.2                     | 10.9        | 6.9   | 6.2  | 7.4                      | 8.1        | 13.8  | 14.4 | 17.0 | 18.9 |
| Ligand                                  | $\beta$ -factor          | A-D         | 16.5  | 14.9 | 17.0                     | 17.3       | 23.5  | 33.2 | 24.0                     | 24.3        | 10.6  | 12.3 | 14.1                     | 13.0        | 12.8  | 12.7 | 16.6                     | 16.5       | 24.4  | 17.5 | 30.6 | 40.4 |
| DTT <sup>c</sup>                        | $\beta$ -factor          | A-D         | 45.9  | 47.9 | 45.8                     | 47.2       | -     | -    | -                        | -           | 47.3  | 46.0 | 43.8                     | 46.8        | 50.0  | -    | -                        | 35.8       | -     | -    | -    | -    |
| DTO <sup>d</sup>                        | $\beta$ -factor          | A-D         | 34.4  | 32.9 | 31.9                     | 36.8       | -     | -    | -                        | -           | 31.8  | 18.8 | 22.2                     | 29.0        | -     | -    | -                        | -          | -     | -    | -    | -    |
| Acetate                                 | $\beta$ -factor          | E           | 22.5  | 26.0 | 27.8                     | 16.9       | 26.3  | 37.0 | -                        | -           | 13.4  | 24.4 | 24.3                     | 22.7        | 17.3  | 25.2 | 26.3                     | 11.3       | 17.5  | -    | -    | -    |
| Glycerol                                | $\beta$ -factor          | F           | -     | 34.6 | 32.3                     | -          | -     | 41.3 | 25.6                     | 30.7        | 31.7  | 42.5 | 36.4                     | 18.9        | 24.4  | 29.9 | -                        | 41.6       | 30.9  | 29.5 | -    | -    |
| Cys168 mod. <sup>e</sup> (A-D)          | DTT                      | DTT         | DTT   | DTT  | CSX                      | -          | -     | -    | -                        | DTT         | DTT   | DTT  | DTT                      | DTT         | CSX   | CSX  | DTT                      | DTT        | CSX   | CSX  | DTT  | -    |

<sup>a</sup> Values in parentheses refer to those of the highest resolution shell.

<sup>b</sup> DPI – Diffraction-component Precision Index.

<sup>c</sup> DTT – linear DTT.

<sup>d</sup> DTO – oxidized circular DTT.

<sup>e</sup> Cys168 oxidized to sulfenic acid (CSX), covalently bound to DTT (DTT), or unmodified (-)
